# Supplementary material for: The Residue and Dietary Risk Assessment of Spirotetramat and Its Four Metabolites in Cabbage Using Ultra-High-Performance Liquid Chromatography–Tandem Mass Spectrometry
Source: MDPI journal article supplement (doi:10.3390/molecules28124763), 2023-06-14
Supplement: s1 [file s1]

**Table S1.** Soil properties and climate conditions for field trials.

| Site      | soil properties |                                                      |                        | Average<br>temperature<br>(°C) | Total<br>precipitation<br>(mm) |
|-----------|-----------------|------------------------------------------------------|------------------------|--------------------------------|--------------------------------|
|           | pH              | Cation exchange capacity<br>(cmol kg <sup>-1</sup> ) | Organic content<br>(%) |                                |                                |
| Shanxi    | 8.32            | 10.28                                                | 1.58                   | 21.5                           | 39.0                           |
| Liaoning  | 6.90            | 19.00                                                | 3.10                   | 23.4                           | 0.0                            |
| Beijing   | 7.47            | 21.10                                                | 1.51                   | 25.8                           | 65.8                           |
| Shandong  | 5.79            | 17.20                                                | 1.21                   | 20.6                           | 37.9                           |
| Henan     | 7.90            | 7.68                                                 | 1.29                   | 24.0                           | 0.0                            |
| Anhui     | 7.40            | 14.20                                                | 1.14                   | 19.5                           | 106.5                          |
| Shanghai  | 8.43            | 34.51                                                | 2.49                   | 26.1                           | 63.2                           |
| Hunan     | 5.00            | 3.10                                                 | 1.63                   | 28.2                           | 1.6                            |
| Guangxi   | 6.70            | 5.60                                                 | 3.18                   | 17.9                           | 10.0                           |
| Guizhou   | 6.51            | 24.80                                                | 4.30                   | 17.2                           | 54.3                           |
| Hainan    | 5.40            | 4.13                                                 | 1.41                   | 19.0                           | 0.0                            |
| Guangdong | 5.90            | 3.90                                                 | 1.02                   | 25.2                           | 70.5                           |

**Table S2.** Terminal residues of STM in cabbage on 3d.

| Locations | Mean resiudes (mg/kg) |        |          |        |              |        |          |        |          |        |       |        |
|-----------|-----------------------|--------|----------|--------|--------------|--------|----------|--------|----------|--------|-------|--------|
|           | STM                   |        | STM-enol |        | STM-enol-glu |        | STM-keto |        | STM-mono |        | Total |        |
|           | 1                     | 2      | 1        | 2      | 1            | 2      | 1        | 2      | 1        | 2      | 1     | 2      |
| Shanxi    | 0.36                  | 0.16   | 0.062    | 0.052  | <0.010       | <0.010 | 0.23     | 0.15   | <0.010   | <0.010 | 0.73  | 0.41   |
| Beijing   | 0.029                 | 0.011  | 0.010    | <0.010 | <0.010       | <0.010 | 0.027    | 0.018  | <0.010   | <0.010 | 0.093 | 0.062  |
| Anhui     | 0.077                 | 0.114  | <0.010   | <0.010 | <0.010       | <0.010 | 0.095    | 0.104  | <0.010   | <0.010 | 0.22  | 0.27   |
| Guangxi   | <0.010                | <0.010 | <0.010   | <0.010 | <0.010       | <0.010 | 0.010    | <0.010 | <0.010   | <0.010 | 0.052 | <0.050 |
